# Supplementary material for: Construction of a well-dispersed Ag/graphene-like g-C3N4photocatalyst and enhanced visible light photocatalytic activity
Source: Royal Society of Chemistry journal article supplement (doi:10.1039/c6ra26498k), 2017-01-01
Supplement: c6ra26498k1.pdf [file c6ra26498k1.pdf]

## Construction of well-dispersed Ag/graphene-like g-C<sub>3</sub>N<sub>4</sub> photocatalyst and enhanced visible light photocatalytic activity

Hao Li<sup>a</sup>, Yue Jing<sup>a</sup>, Xinlong Ma<sup>a</sup>, Tongyao Liu<sup>a</sup>, Linfeng Yang<sup>a</sup>, Bin Liu<sup>a</sup>, Shu Yin<sup>b</sup>, Zhiyong Wei<sup>a</sup> and Yuhua Wang<sup>a,\*</sup>

<sup>1</sup> Department of Materials Science, School of Physical Science and Technology, Lanzhou University, Lanzhou, 730000, China

<sup>2</sup> Institute of Multidisciplinary Research for Advanced Materials, Tohoku University, 2-1-1 Katahira, Aoba-ku, Sendai, Japan

<sup>1,\*</sup>Corresponding author: Yuhua Wang, Ph. D, Professor.

Tel: +86-931-8912772; Fax: +86-931-8913554

E-mail address: wyh@lzu.edu.cn.

### Supplementary Information

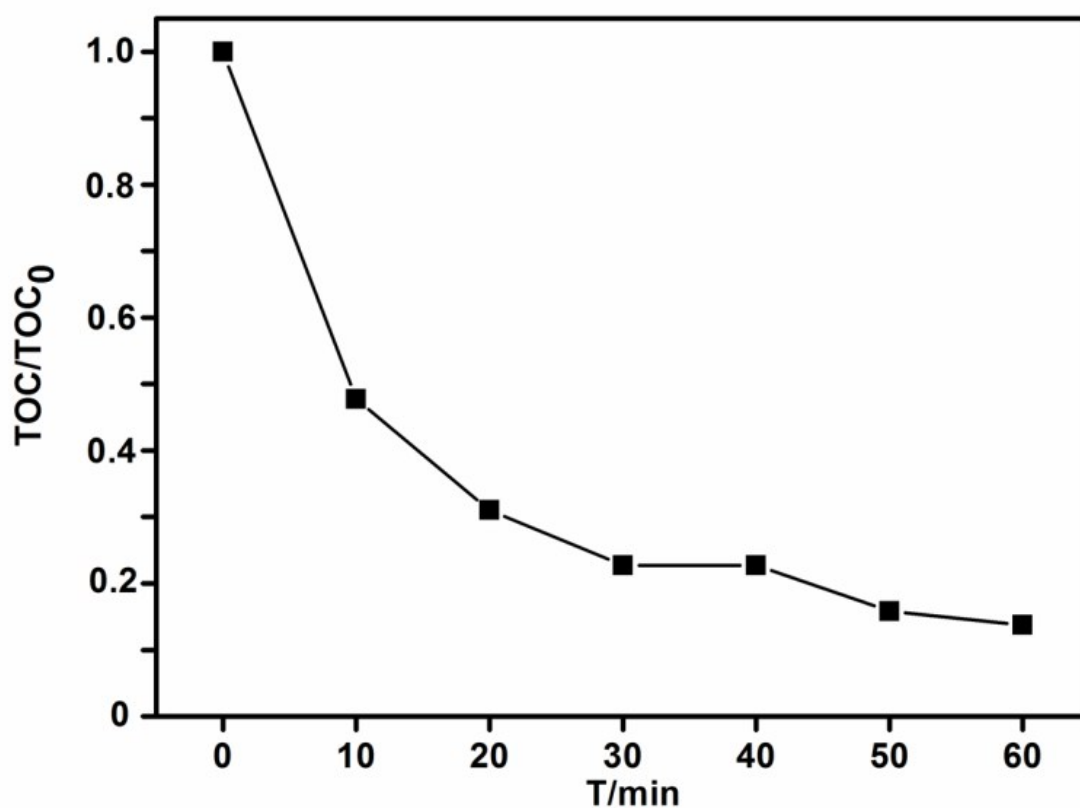

Fig.S1 TOC removal of MB in the presence of Ag-G-g-C<sub>3</sub>N<sub>4</sub> composite.

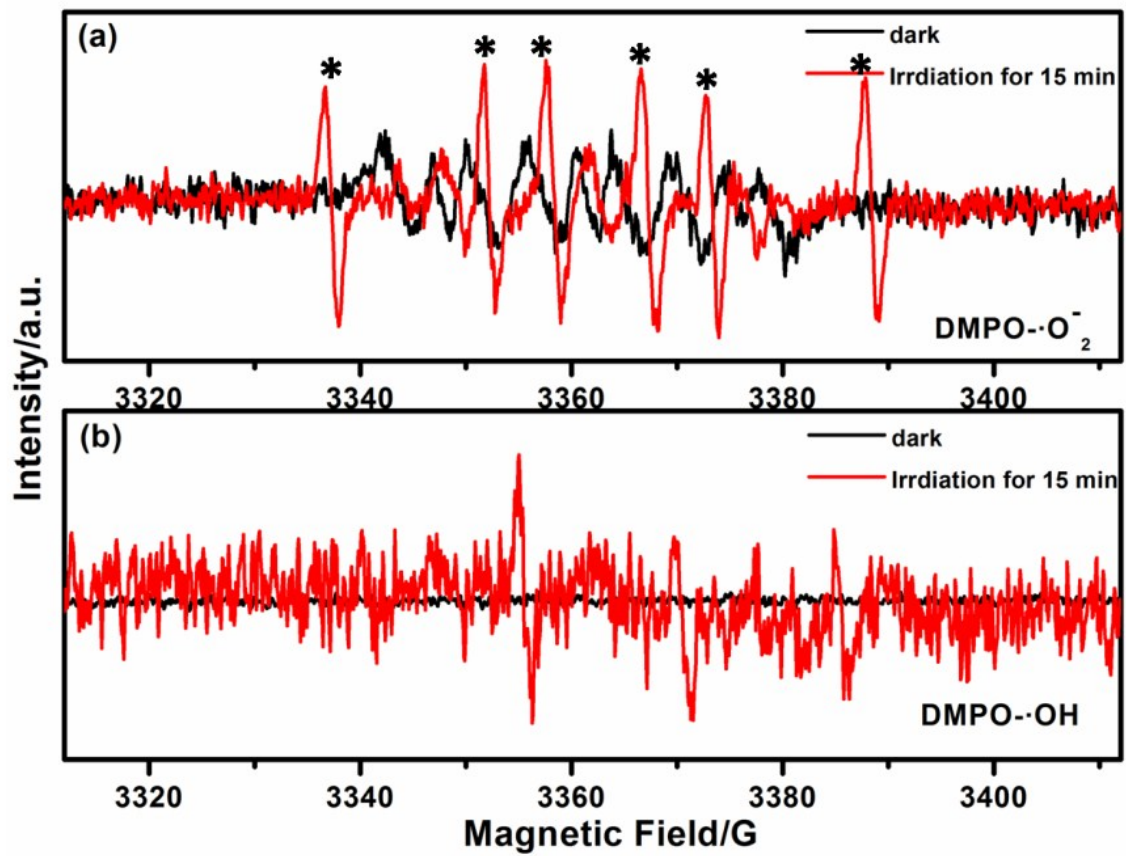

Fig.S2 DMPO spin-trapping ESR spectra of Ag/G-g-C<sub>3</sub>N<sub>4</sub> composite (a) in methanol dispersion for DMPO-•O<sub>2</sub><sup>-</sup> and (b) in aqueous dispersion for DMPO-•OH under light irradiation.

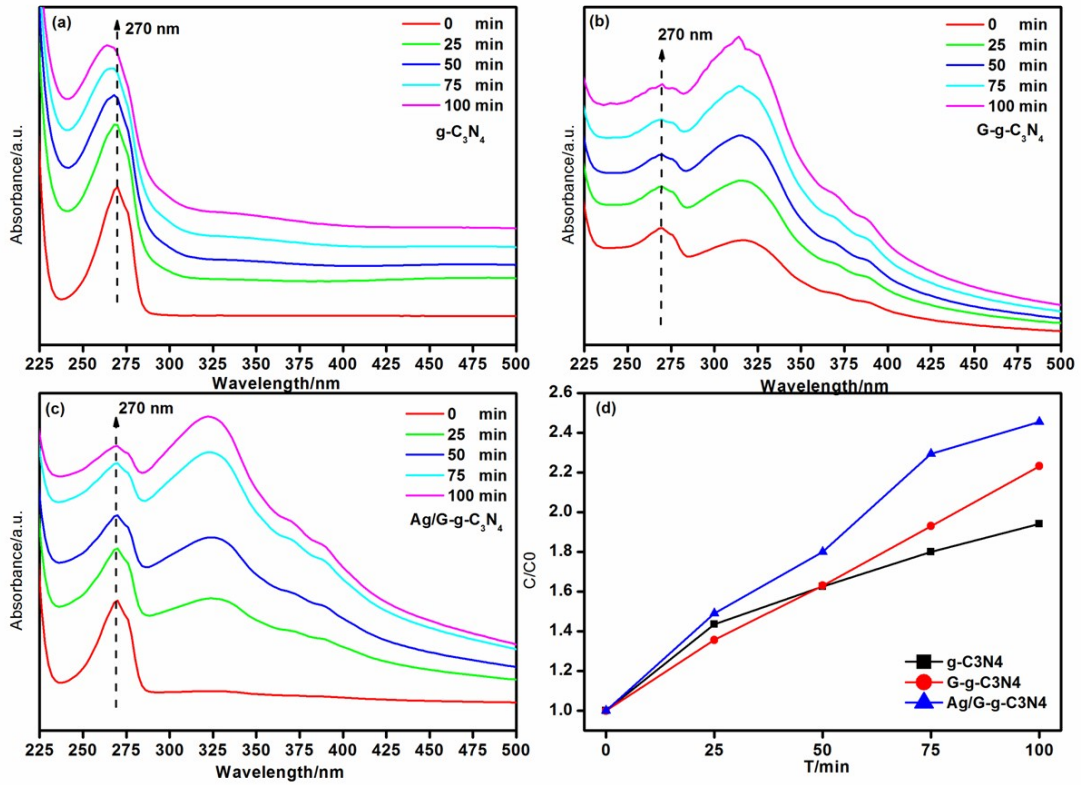

Fig.S3 Time-dependent absorption spectra of phenol solution degraded by  $g\text{-C}_3\text{N}_4$  (a),  $G\text{-}g\text{-C}_3\text{N}_4$  (b) and  $\text{Ag}/G\text{-}g\text{-C}_3\text{N}_4$  (c) under visible light irradiation. Correspondingly degradation dynamics curves of phenol over above samples under visible light irradiation (d).
